# Supplementary material for: Assessment of the protein interaction between coagulation factor XII and corn trypsin inhibitor by molecular docking and biochemical validation
Source: PubMed Central journal article supplement (PMC5638086; doi:10.1111/jth.13773), 2017-08-09
Supplement: JTH-15-1818-s002.pdf [file JTH-15-1818-s002.pdf]

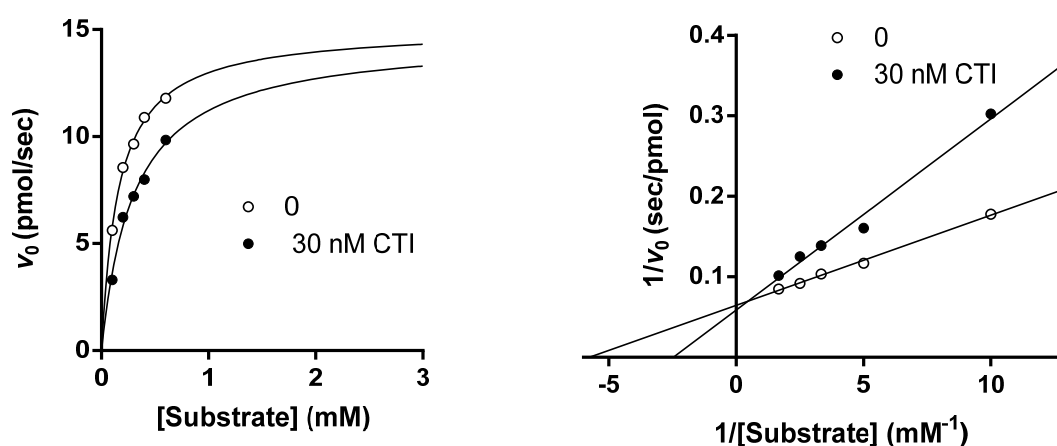

|                                   | 0 nM CTI     | 30 nM CTI    |
|-----------------------------------|--------------|--------------|
| $K_{m \text{ app}} (\mu\text{M})$ | $162 \pm 19$ | $301 \pm 72$ |
| $k_{\text{cat}}$                  | $15 \pm 1$   | $15 \pm 2$   |
| $K_i (\square\text{M})$           |              | $29 \pm 4$   |

**Figure S3: analysis of CTI inhibitory mechanism**

0.1 to 0.6 mM of substrate peptide was incubated without (open symbols) or with 30 nM CTI (closed symbols), after which 10 nM  $\alpha$ -FXIIa (equalling to 1 pmol of enzyme) was added and enzyme activity was measured as described in the method section. Data were analysed by non-linear regression (top left panel) and linear regression after Lineweaver Burk transformation (top right panel) and catalytic parameters are summarised in the table..

A

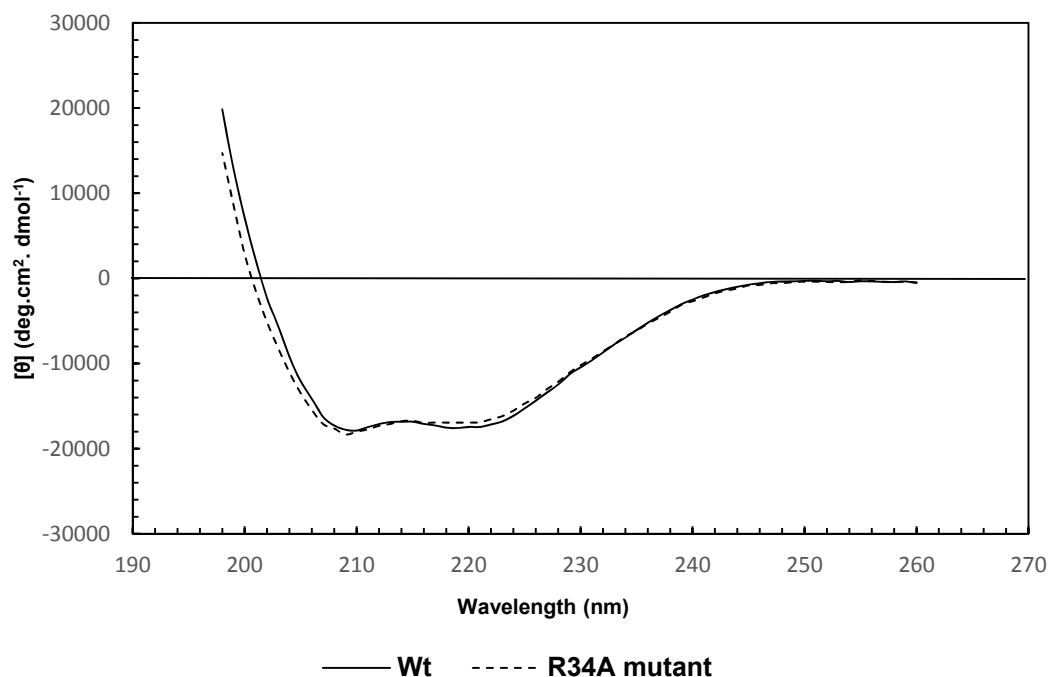

B

|              | 205-260nm |       |
|--------------|-----------|-------|
|              | Wt        | R34A  |
| Helix        | 58.4%     | 58.3% |
| Antiparallel | 4.1%      | 4.1%  |
| Parallel     | 4.2%      | 4.2%  |
| Beta-turn    | 13.3%     | 13.3% |
| Random Coil  | 19.2%     | 19.2% |
| Total Sum    | 99.1%     | 99.1% |

**Figure S4: CD spectra of wild type and mutant (R34A) CTI recombinant protein.**

A: Far UV spectrum of recombinant CTI (solid line) and CTI(R34A) (dotted line) samples (0.15 mg/ml). An average of three scans was taken for each sample and a buffer blank sample consisting of CD Buffer alone was subtracted from the averaged spectra. B: Secondary structure estimation from CD spectra predicted using CDNN software. For details see the methods section.

A

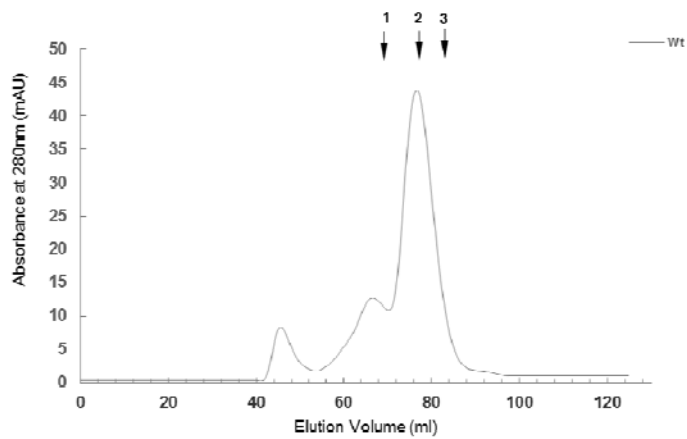

B

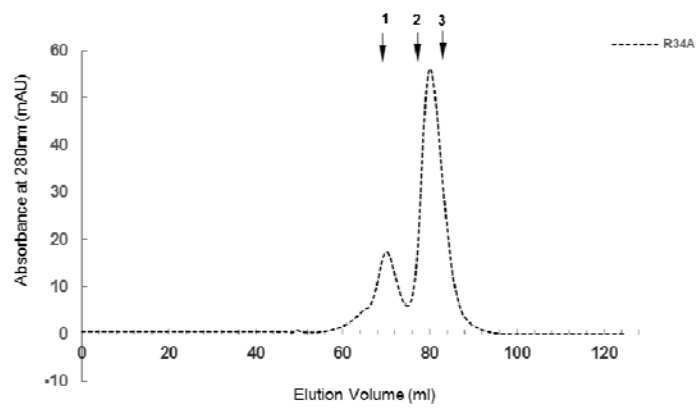

C

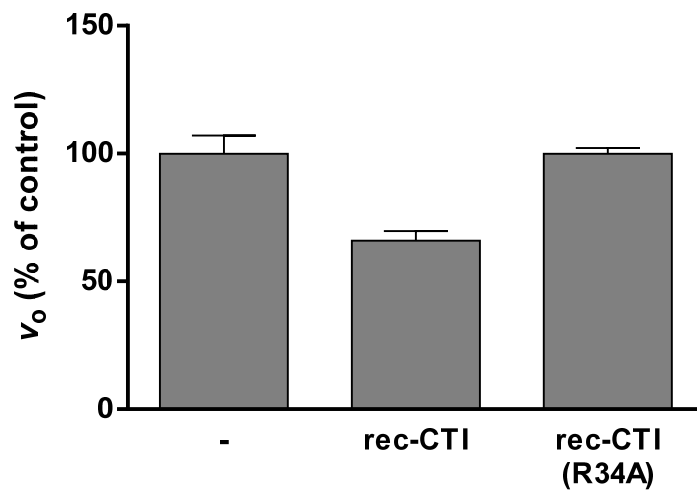

**Figure S5: Gel filtration of Recombinant CTI and CTI(R34A)**

Recombinant CTI (A) and CTI(R34A) (B) were analysed by gel filtration as described in the methods section. Arrows numbered 1, 2, 3 indicate elution volume of molecular weight standards of 158 kD, 75 kD and 44 kD respectively. (C)  $10^{-7}$  M (final concentration) protein

was incubated with 200  $\mu$ M substrate peptide followed by addition of 10 nM  $\alpha$ -FXIIa.

Velocities are expressed as % of no inhibitor control (n=4).
